# Supplementary material
Source: JCI journal article supplement (doi:10.1172/jci198593)

**Figure 3B-left**

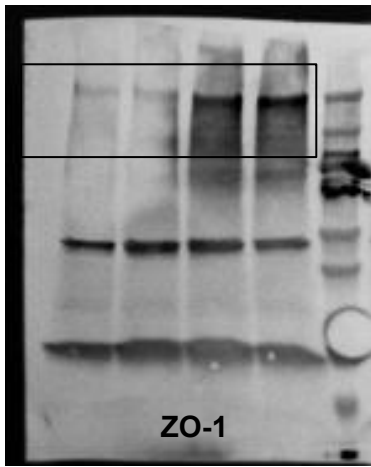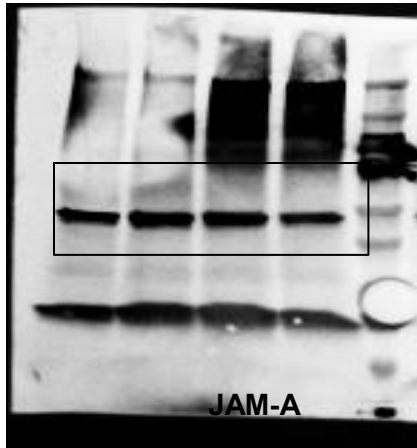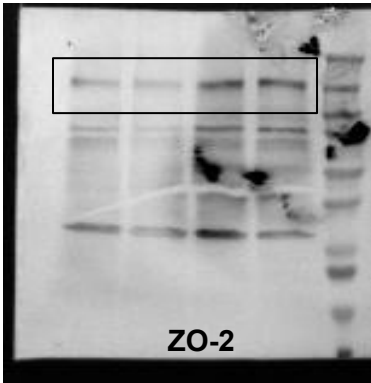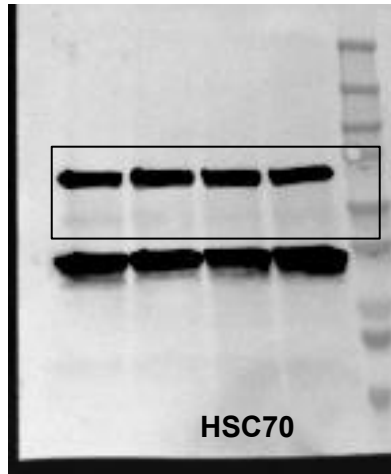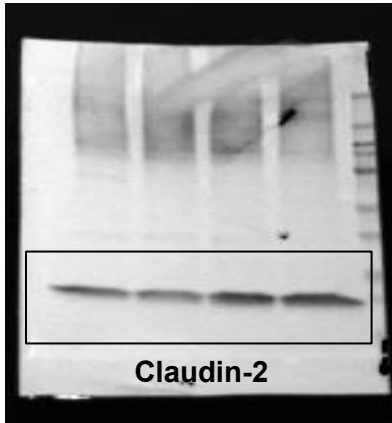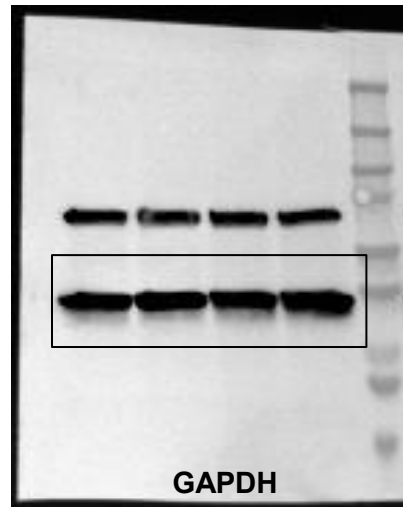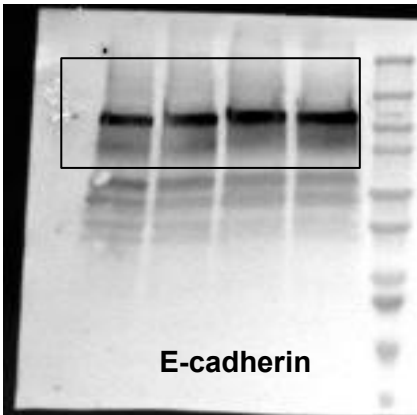

**Figure 3B-right**

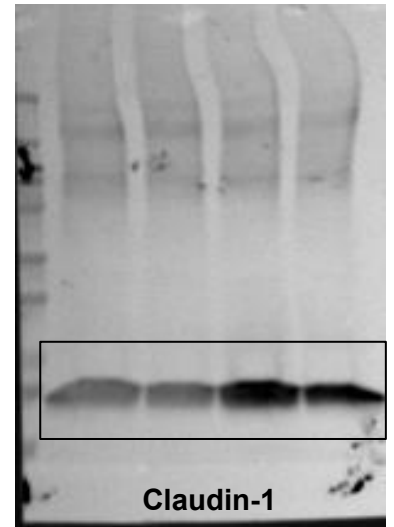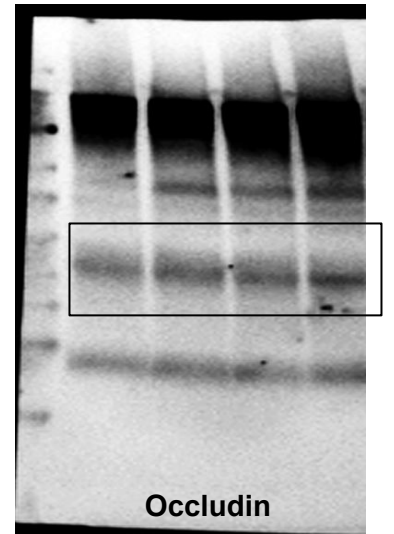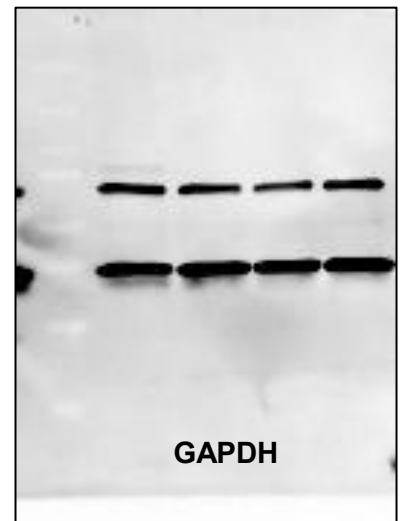

- ZO-1 and JAM-A was from same immunoblot incubated with both anti-ZO-1 and anti-JAM-A antibodies together, while HSC70 and GAPDH was from a immunoblot incubated with both anti-HSC70 and anti-GAPDH antibodies together.

**Figure 4E**

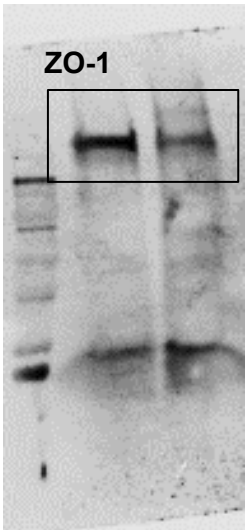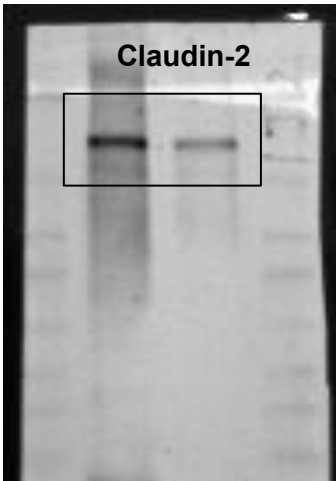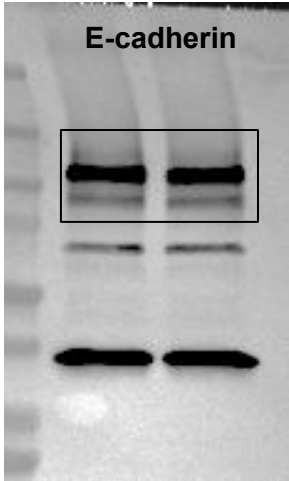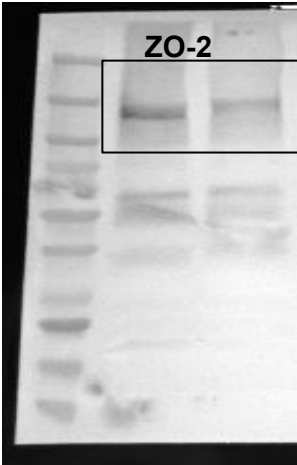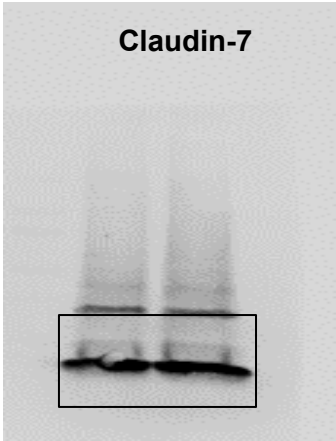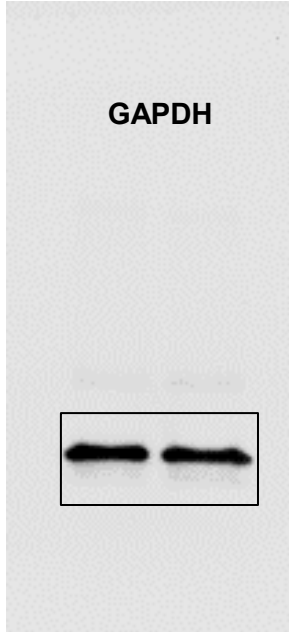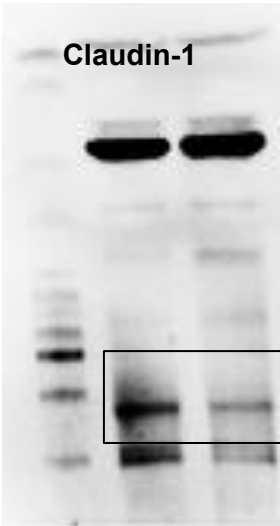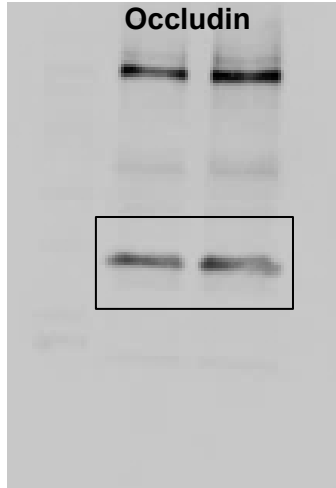

**Figure 5B-Top**

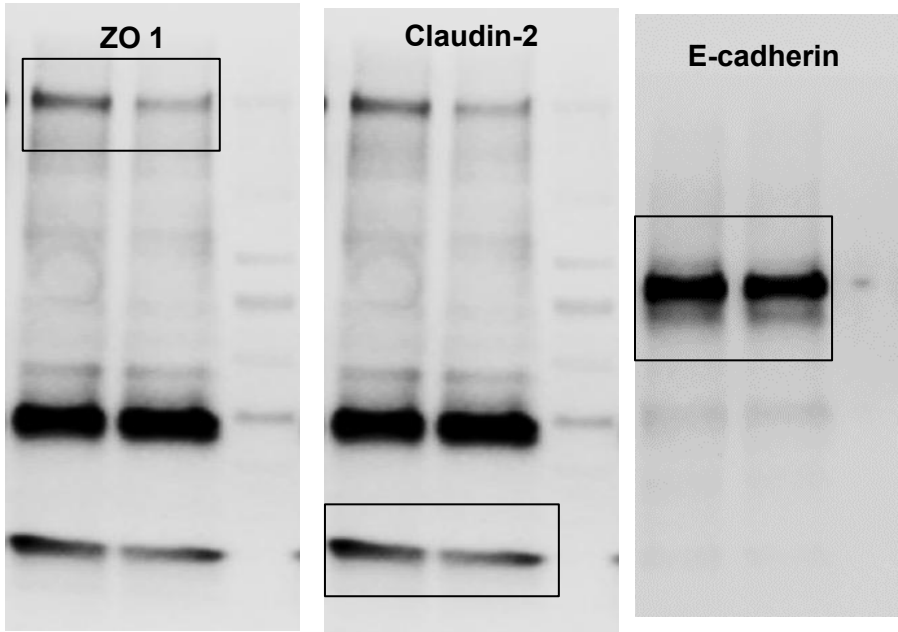

**Figure 5B-low**

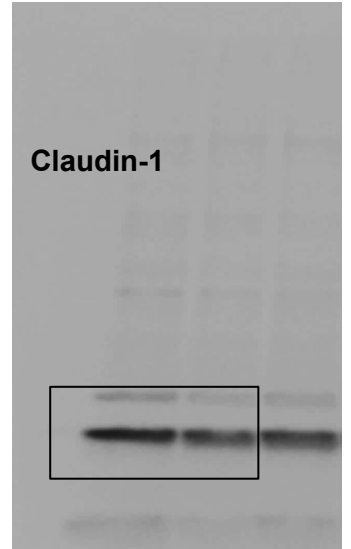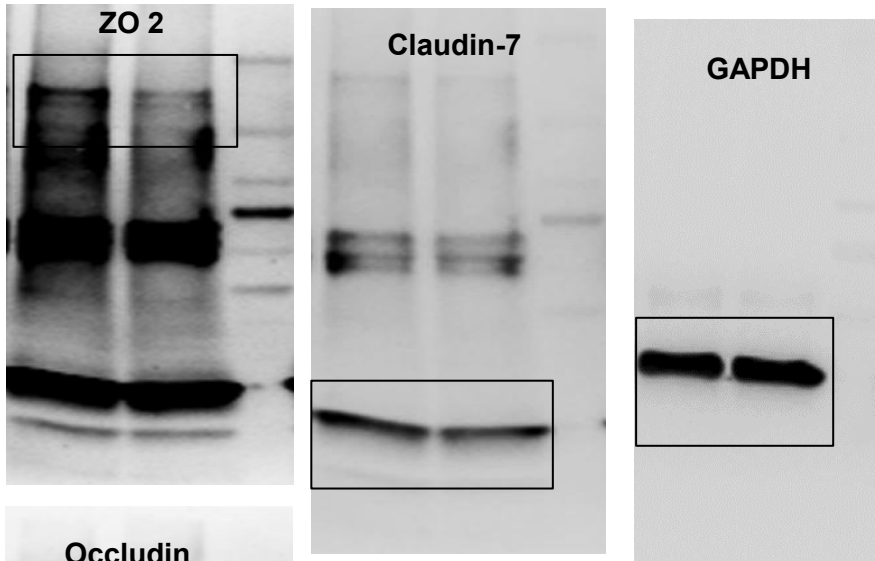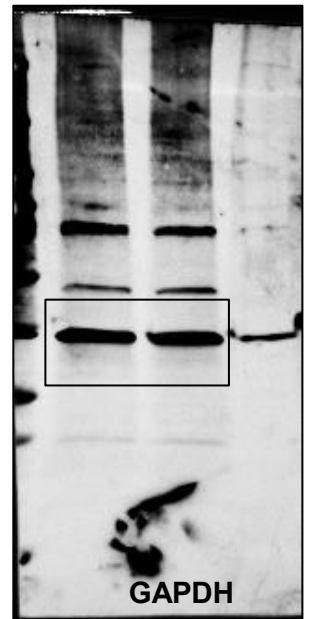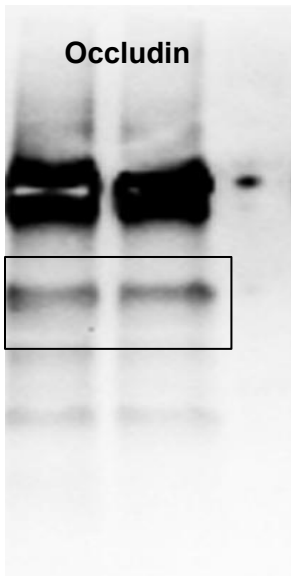

- ZO-1 and claudin-2 was from same immunoblot incubated with both anti-ZO-1 and anti-claudin-2 antibodies together.

**Figure 6B-Top**

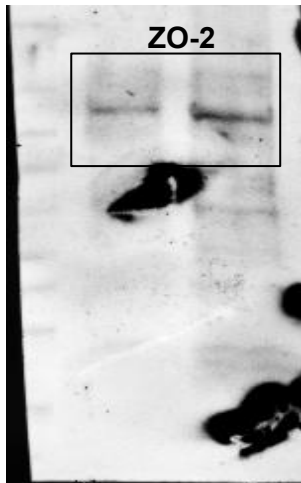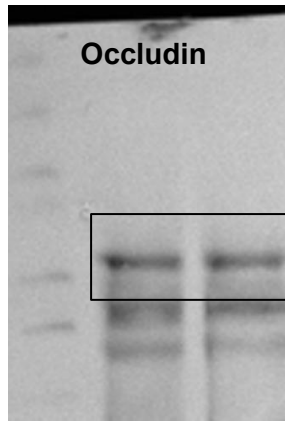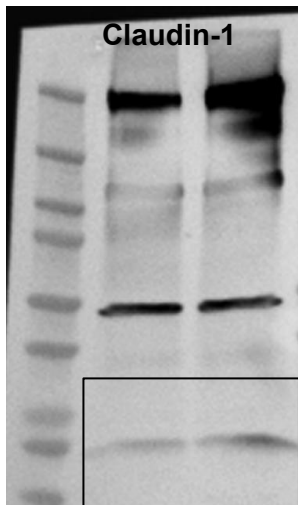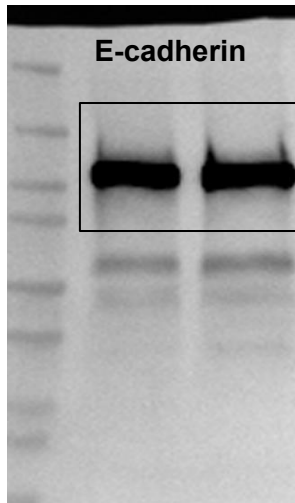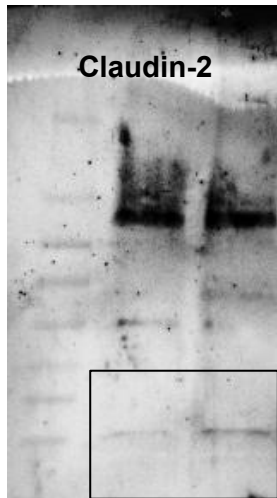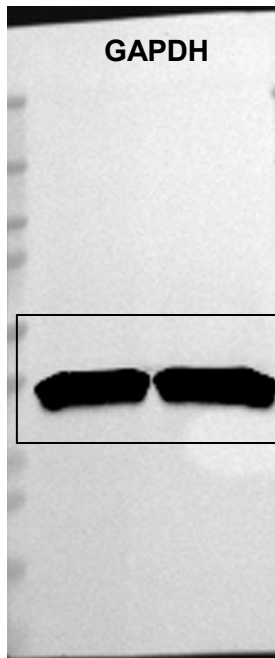

**Figure 6B-Low**

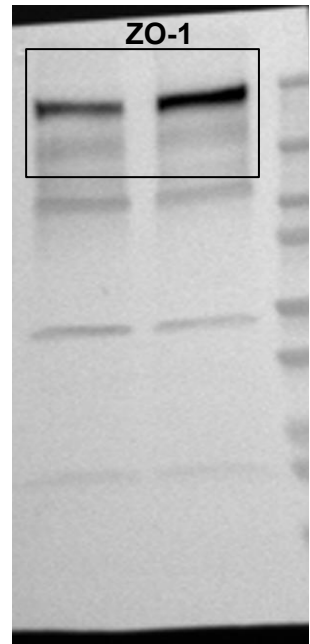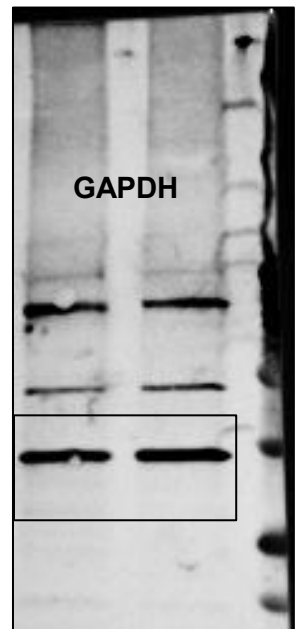

**Figure 8B**

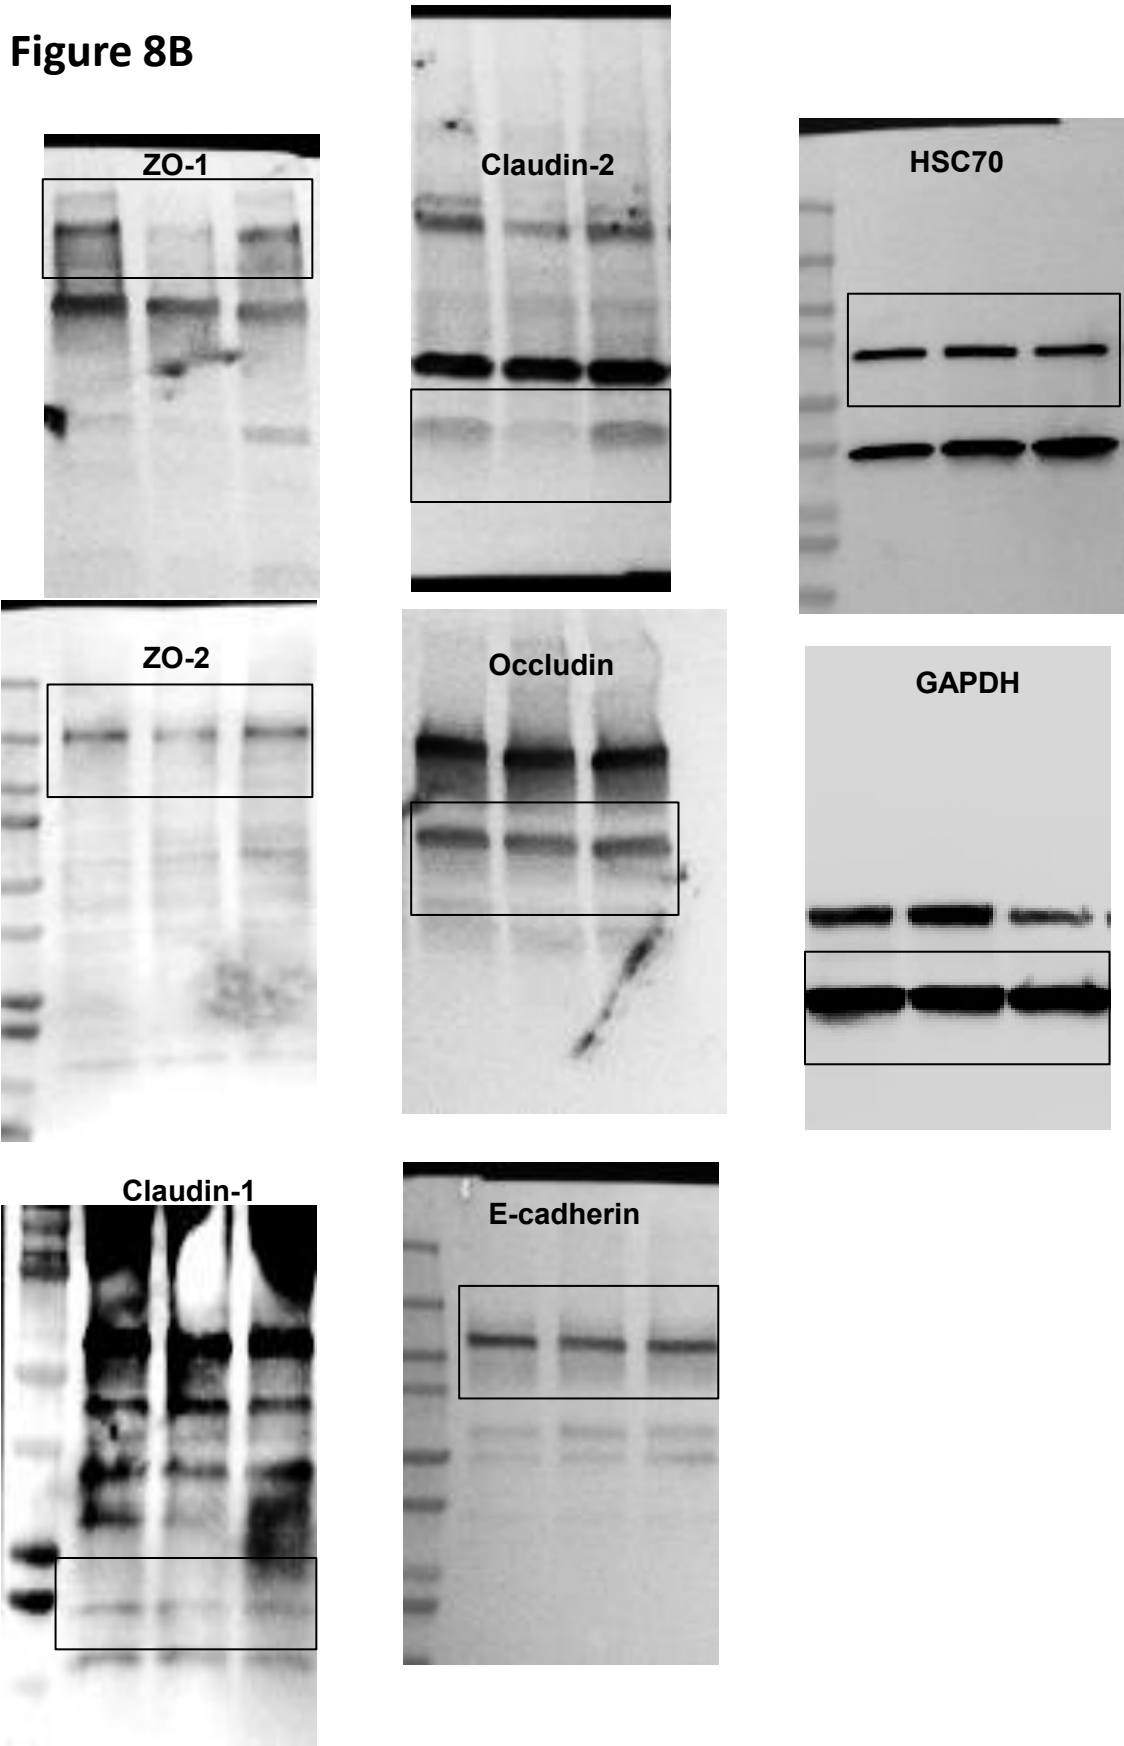

Supplement: sd2 [file 2]
