# Supplementary material
Source: JCI journal article supplement (doi:10.1172/jci198593)
Supplement: sd1 [file 1]

**A**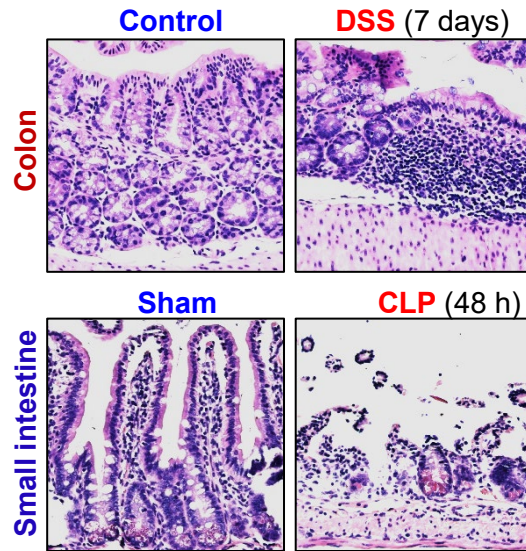

**B** sgRNA #1: GAGTTGCGGGCGCACAGGTG  
Protospacer adjacent motif (PAM) AGG  
sgRNA #2: GCCCAGTGACTGGATGGTAT PAM TGG  
sgRNA #3: CCCC GCGGCAAGGGAGTTGC PAM GGG  
sgRNA #4: ACCAATACCATCCAGTCACT PAM GGG

**C**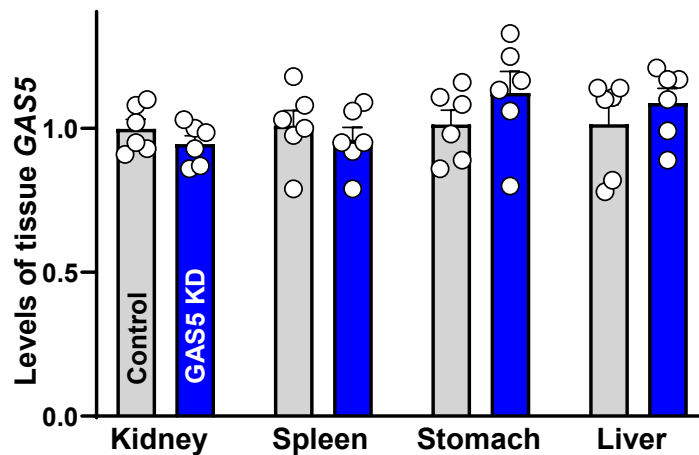

**Supplemental Figure 1.** (A) Images of H&E staining of mouse DSS-induced colitis (top) and CLP-induced small intestinal mucosal injury (bottom). (B) Sequences of sgRNAs used for deleting GAS5 in IE-Cas9 mice. (C) Changes in the levels of GAS5 in kidney, spleen, stomach, and liver in control and GAS5 KD mice. Values are the means  $\pm$  SEM ( $n = 6$ ).

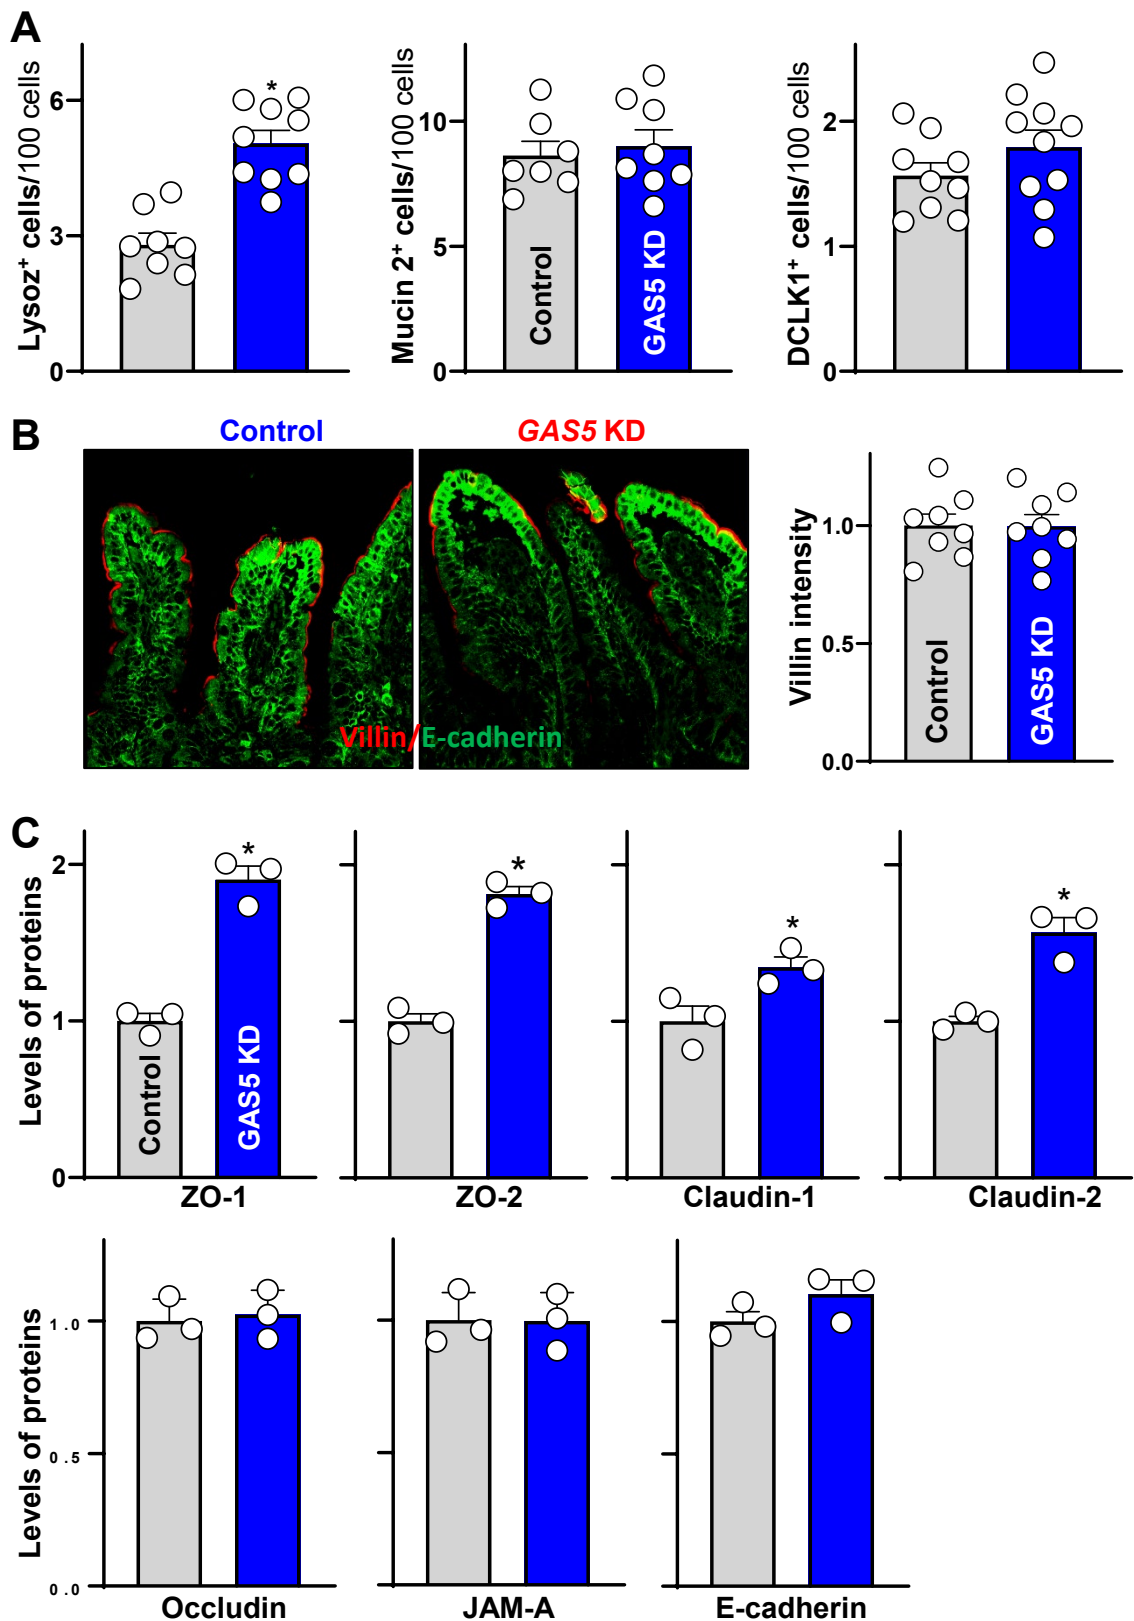

**Supplemental Figure 2.** (A) Changes in lysozyme (lysoz)-positive, mucin 2-positive, and DCLK1-positive cells in the small intestinal mucosa as described in Figure 3A. Values are the means  $\pm$  SEM ( $n = 8$  or  $10$ ). \* $P < 0.05$  compared with controls. (B) Enterocyte differentiation in small intestinal mucosa of control and GAS KD mice as measured by villin immunostaining assay. Values are the means  $\pm$  SEM ( $n = 8$ ). (C) Densitometric analysis of immunoblots shown in Figure 3B. Values are the means  $\pm$  SEM ( $n = 3$ ). \* $P < 0.05$  compared with controls.

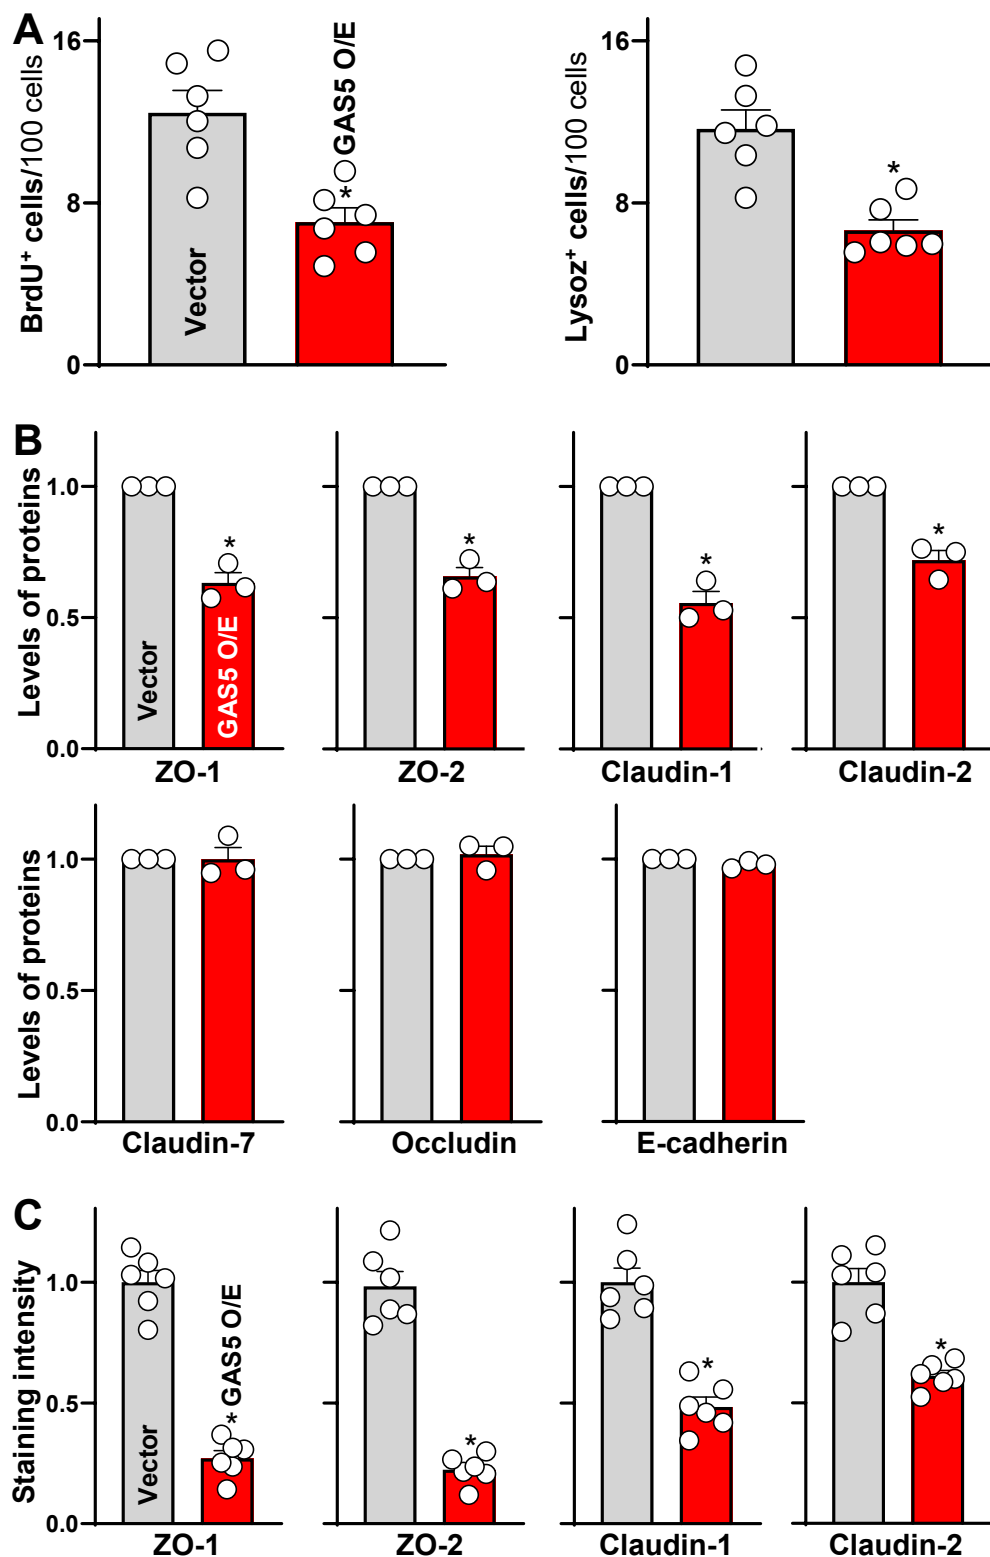

**Supplemental Figure 3.** (A) Changes in the levels of BrdU-positive (*left*) and lysozyme (lysoz)-positive (*right*) cells in intestinal organoids transfected with control vector and GAS5 expression vector (GAS5 O/E) as described in Figure 4C&D. Values are the means  $\pm$  SEM ( $n = 6$ ). \*  $P < 0.05$  compared with control vector. (B) Densitometric analysis of immunoblots shown in Figure 4E. \* $P < 0.05$  compared with controls ( $n = 3$ ). (C) Fluorescence staining intensity of various TJ proteins described in in Figure 4F. \*  $P < 0.05$  compared with controls ( $n = 6$ ).

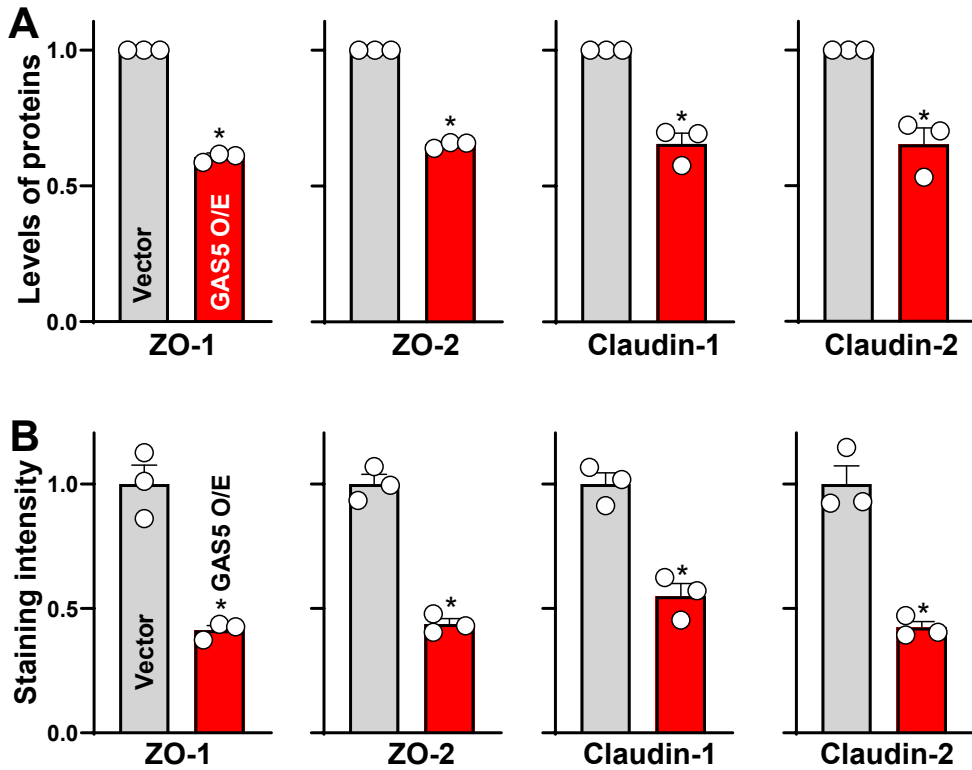

**Supplemental Figure 4.** (A) Densitometric analysis of immunoblots of various tight junction proteins in Caco-2 cells after GAS5 overexpression (GAS5 O/E) as shown in Figure 5B. Values are the means  $\pm$  SEM ( $n = 3$ ). \*  $P < 0.05$  compared with control vector. (B) Fluorescence intensity of various tight junction proteins as described in Figure 5C. \*  $P < 0.05$  compared with controls ( $n = 3$ ).

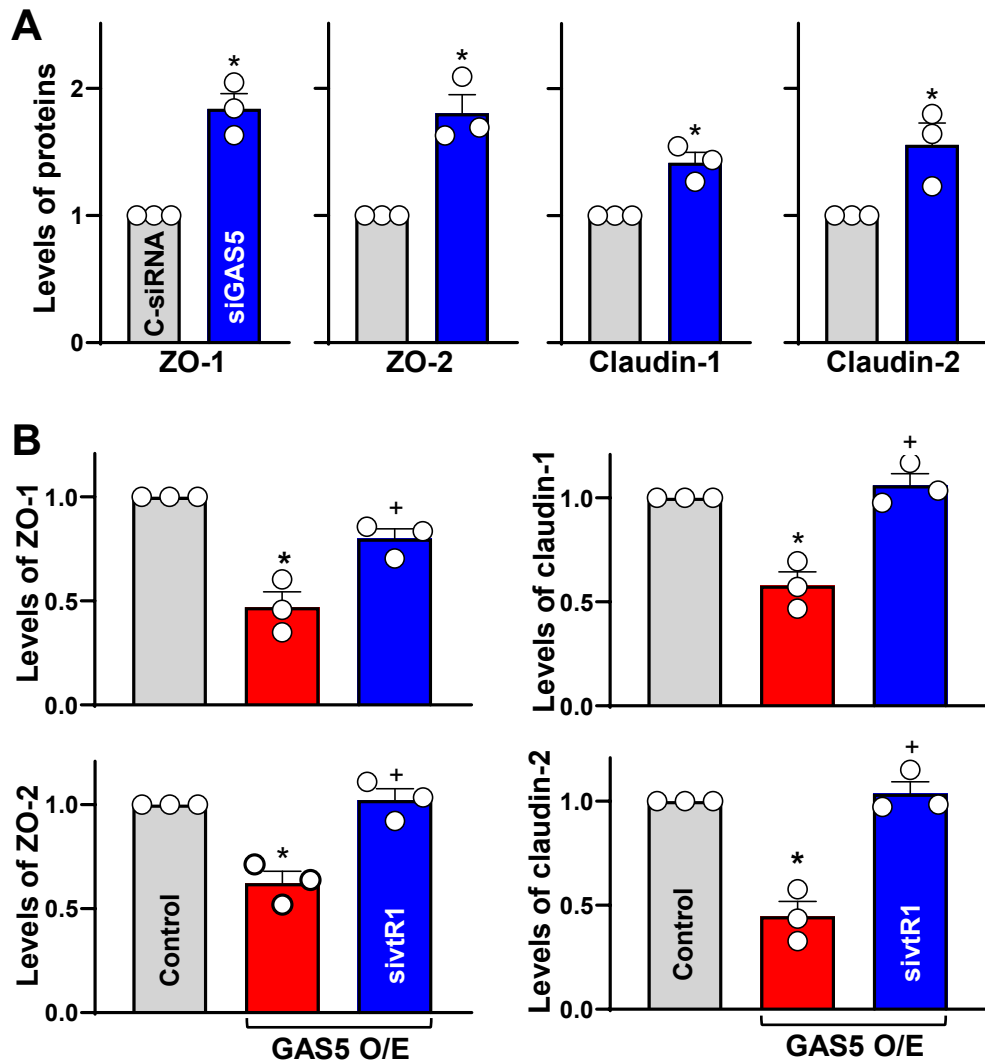

**Supplemental Figure 5.** (A) Densitometric analysis of immunoblots of various tight junction protein in Caco-2 cells after GAS5 silencing as shown in Figure 6B. Values are the means  $\pm$  SEM ( $n = 3$ ). \*  $P < 0.05$  compared with C-siRNA. (B) Densitometric analysis of immunoblots of tight junction proteins 48 h after transfection with GAS5 expression vector alone or co-transfection with GAS5 expression vector and siRNA targeting vtRNA1 (sivtR1) as shown in Figure 8B. \*+  $P < 0.05$  compared with controls and GAS5 O/E, respectively ( $n = 3$ ).
